# Supplementary material for: Nanosheets and 2D-nanonetworks by mutually assisted self-assembly of fullerene clusters and DNA three-way junctions
Source: Royal Society of Chemistry journal article supplement (doi:10.1039/c9na00485h), 2019-01-01
Supplement: c9na00485h1.pdf [file c9na00485h1.pdf]

## Supporting Information

### **Nanosheets and 2D-Nanonetworks by Mutually Assisted Self-Assembly of Fullerene Clusters and DNA Three-way Junctions**

Sandeepa Kulala Vittala,<sup>a</sup> Sajena Kanangat Saraswathi,<sup>a</sup> Anjali Bindu Ramesan<sup>a</sup> and Joshy Joseph<sup>\*,a</sup>

<sup>a</sup> Photosciences and Photonics Section, CSIR-National Institute for Interdisciplinary Science and Technology (NIIST), Trivandrum 695 019, India and Academy of Scientific and Innovative Research (AcSIR), New Delhi 110 001, India  
E-mail: joshyja@gmail.com

| Sl. No. | Contents                                                                                                                                                                                                         | Page No |
|---------|------------------------------------------------------------------------------------------------------------------------------------------------------------------------------------------------------------------|---------|
| 1.      | Changes in the UV-Visible absorption of <b>F-An</b> nanoclusters upon addition of <b>3WJ-20</b> and corresponding half reciprocal plot                                                                           | 1       |
| 2.      | Changes in the UV-Visible absorption of <b>F-An</b> nanoclusters upon addition of <b>3WJ-30</b> and corresponding half reciprocal plot                                                                           | 1       |
| 3.      | Changes in the absorption at 260 nm in the presence and absence of <b>F-An</b> with increasing concentration of <b>3WJ-20</b> and Changes in the absorption of <b>F-An</b> with the sequential addition of DNA 1 | 2       |
| 4.      | Changes in the absorption and emission spectra of ethidium bromide in the presence of increasing concentrations of <b>3WJ-30</b>                                                                                 | 2       |
| 5.      | Changes in the absorption and emission spectra of ethidium bromide/ <b>3WJ-30</b> complex in the presence of increasing concentrations of <b>F-An</b>                                                            | 3       |
| 6.      | Thermal denaturation curves for <b>3WJ-20</b> , <b>3WJ-OH</b> , <b>3WJ-30</b> and <b>3WJ-30/F-An</b>                                                                                                             | 3       |
| 7.      | Circular dichroism studies of <b>3WJ-20</b> , <b>3WJ-30</b> , <b>3WJ-OH</b> , <b>3WJ-20/F-An</b> , <b>3WJ-30/F-An</b> and, <b>3WJ-OH/F-An</b>                                                                    | 4       |
| 8.      | AFM and TEM image of <b>F-An</b> clusters                                                                                                                                                                        | 4       |
| 9.      | EDAX analysis of <b>3WJ-30/F-An</b> nanosheets showing corresponding peaks arising from the phosphorous and oxygen atoms of DNA backbone.                                                                        | 5       |
| 10.     | DLS measurements of <b>F-An</b> , <b>3WJ-30/F-An</b> and <b>3WJ-OH/F-An</b> and corresponding correlogram plots.                                                                                                 | 5       |
| 11.     | EDAX analysis of <b>3WJ-OH/F-An</b> entangled nanonetwork                                                                                                                                                        | 6       |

|     |                                                                                                                |   |
|-----|----------------------------------------------------------------------------------------------------------------|---|
| 12. | TEM image of <b>3WJ-OH/AgNCs</b> and <b>3WJ-OH/F-An</b> stabilized AgNCs showing realigned nanosheet structure | 6 |
| 13. | EDAX analysis of <b>3WJ-OH/AgNCs</b> and <b>3WJ-OH/F-An</b> nanonetwork embedded AgNCs                         | 7 |
| 14. | Additional AFM images of <b>3WJ-30/F-An</b> nanosheets                                                         | 7 |
| 15. | Additional TEM images of <b>3WJ-30/F-An</b> nanosheets                                                         | 7 |

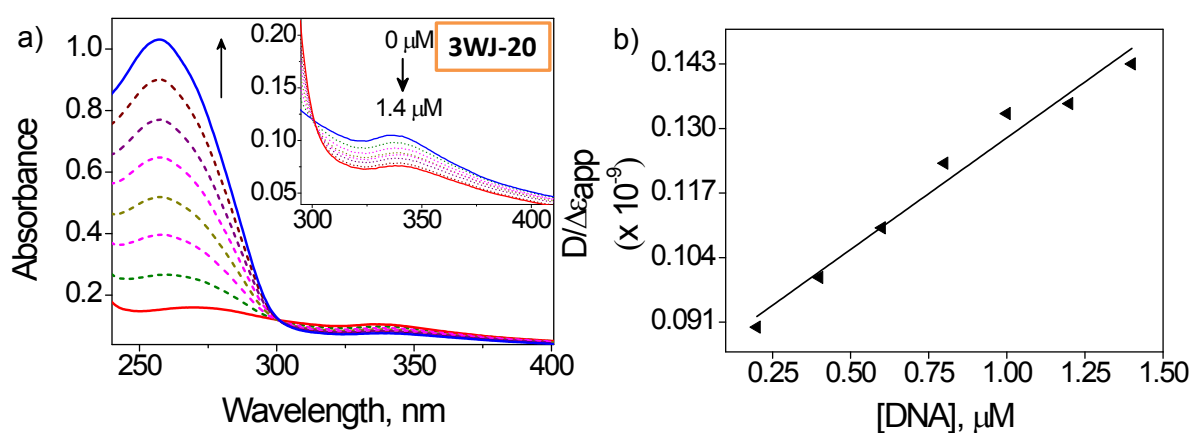

**Figure S1.** a) Changes in the UV-Visible absorption of **F-An** nanoclusters (3  $\mu\text{M}$ ) upon addition of **3WJ-20** and b) corresponding half reciprocal plot with increase in [**3WJ-20**].

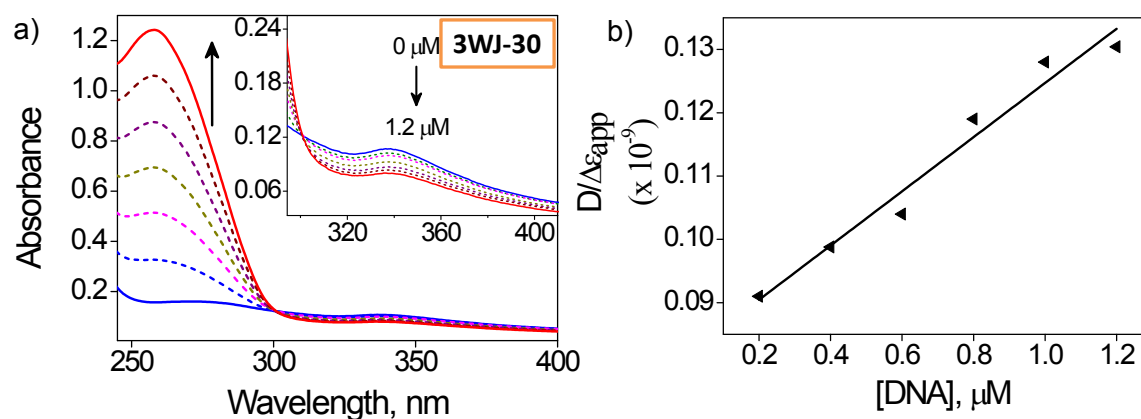

**Figure S2.** a) Changes in the UV-Visible absorption of **F-An** nanoclusters (3  $\mu\text{M}$ ) upon addition of **3WJ-30** and b) corresponding half reciprocal plot with increase in [**3WJ-30**].

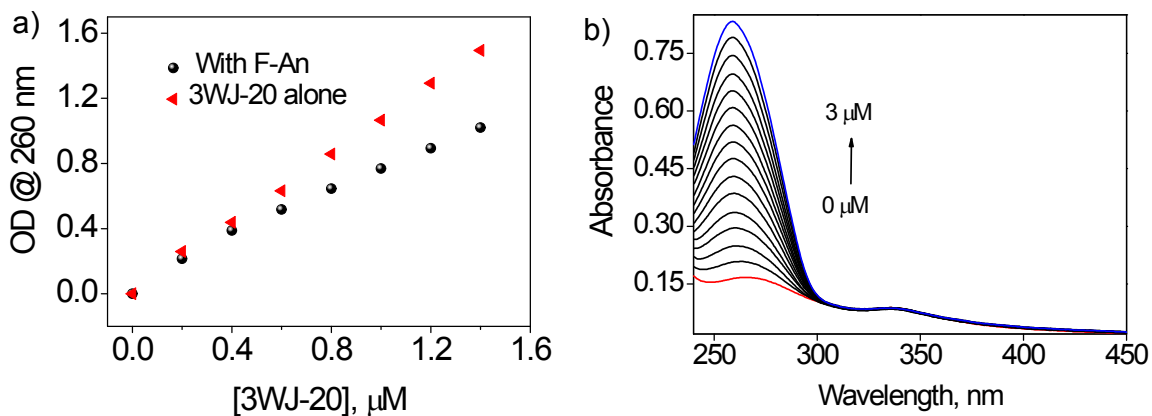

**Figure S3.** a) Absorption changes at 260 nm in the presence and absence of **F-An** with increasing [3WJ-20]. b) Changes in the absorption of **F-An** with the sequential addition of [DNA 1].

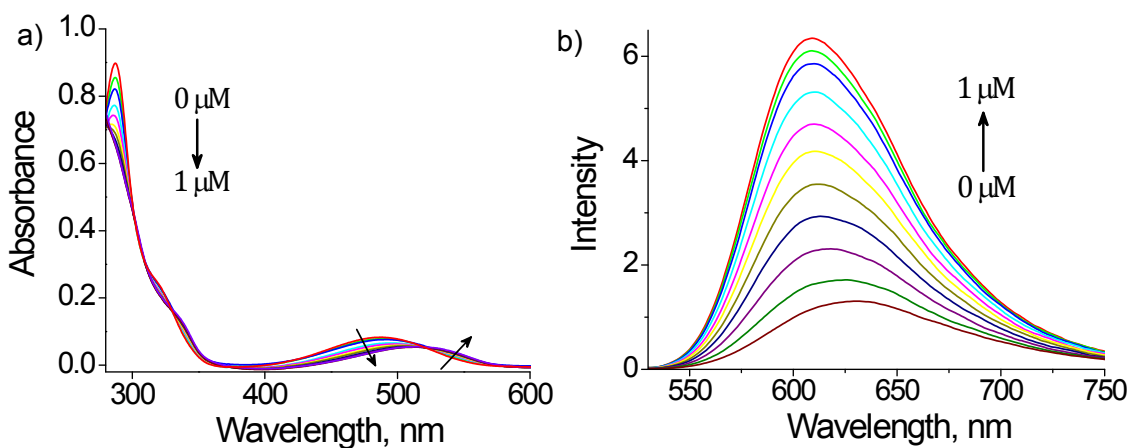

**Figure S4.** Changes in the (a) absorption spectra and (b) emission spectra of ethidium bromide (30  $\mu\text{M}$ ) in the presence of increasing concentrations of **3WJ-30**.  $\lambda_{\text{ex}}$ , 515 nm.

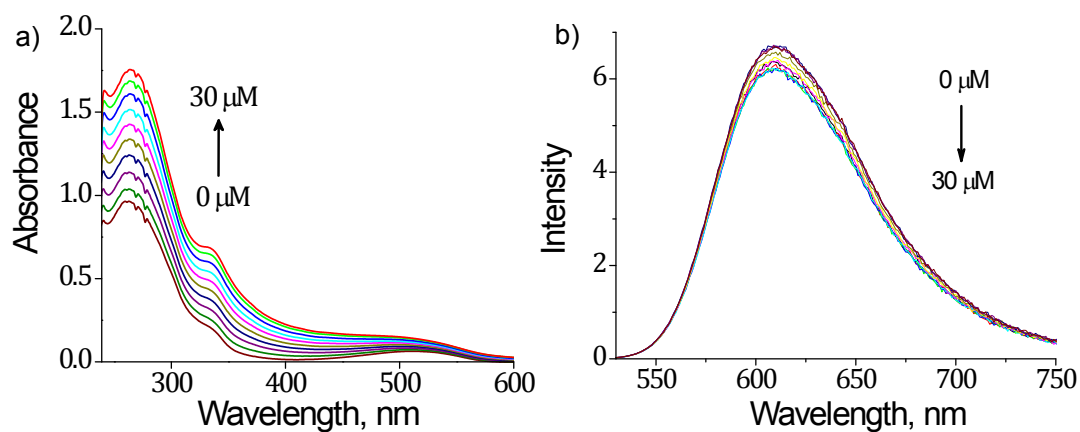

**Figure S5.** Changes in the (a) absorption spectra and (b) emission spectra of ethidium bromide/**3WJ-30** complex (30  $\mu\text{M}$ /1  $\mu\text{M}$ , 1:1) in the presence of increasing concentrations of **F-An**.  $\lambda_{\text{ex}}$ , 515 nm.

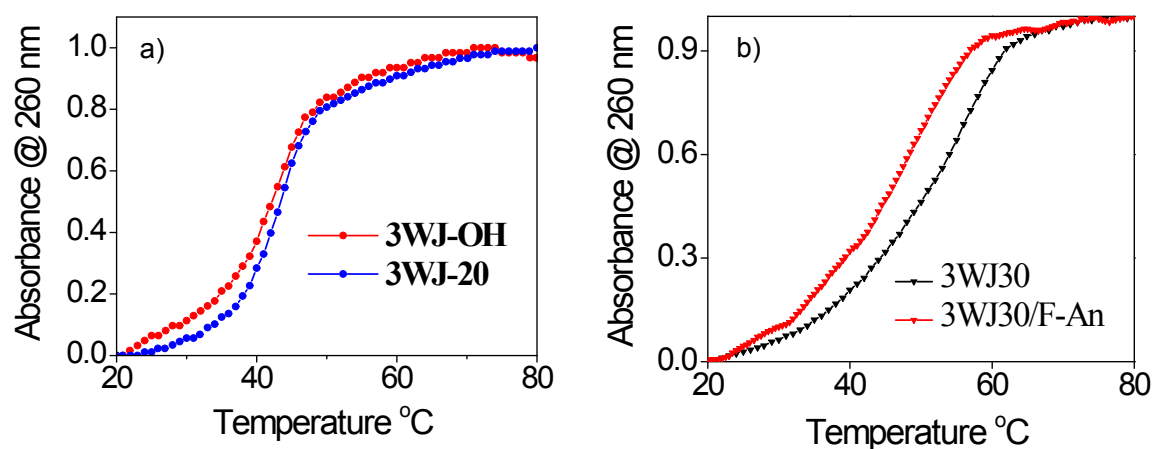

**Figure S6.** Thermal denaturation curves for a) **3WJ-OH** (3  $\mu\text{M}$ ,  $T_m = 43$   $^{\circ}\text{C}$ ) and **3WJ-20** (3  $\mu\text{M}$ ,  $T_m = 44$   $^{\circ}\text{C}$ ) b) **3WJ-30** (3  $\mu\text{M}$ ,  $T_m = 55$   $^{\circ}\text{C}$ ) and **3WJ-30/F-An** (1:1, 1  $\mu\text{M}$  each,  $T_m = 48$   $^{\circ}\text{C}$ ), absorbance monitored at 260 nm (10% DMSO-PBS, 10 mM phosphate buffer, 100 mM NaCl, pH=7.4).

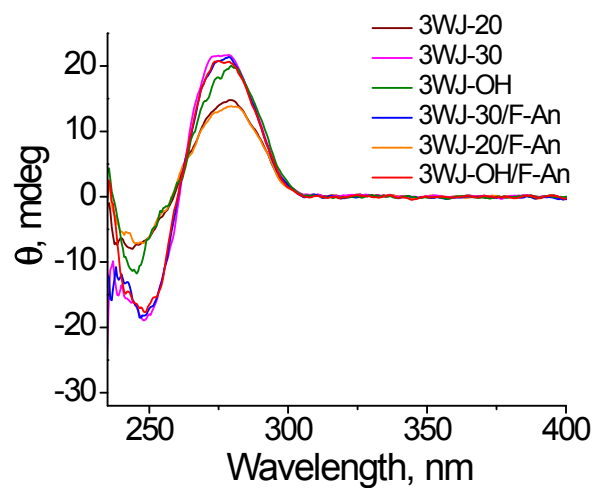

**Figure S7.** The circular dichroism spectra of **3WJ-20**, **3WJ-30**, **3WJ-OH**, **3WJ-20/F-An**, **3WJ-30/F-An** and **3WJ-OH/F-An** ( $c = 3 \mu\text{M}$  each)

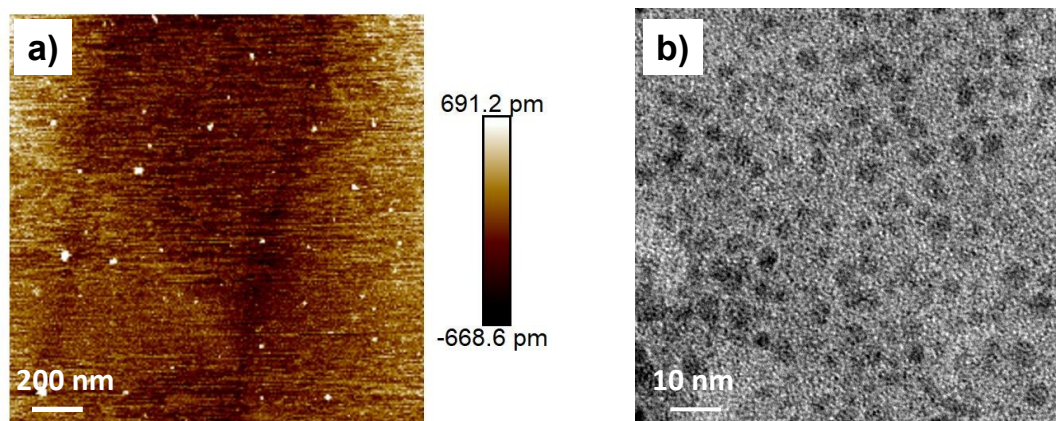

**Figure S8.** a) AFM and b) TEM image of **F-An** clusters.

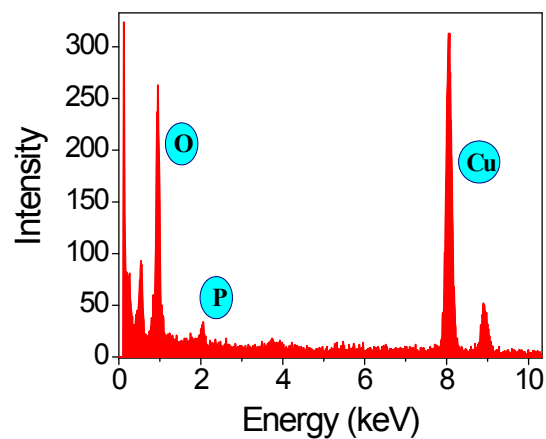

**Figure S9.** EDAX analysis of **3WJ-30/F-An** (1:1) nanosheets showing corresponding peaks arising from the phosphorous atoms of DNA backbone.

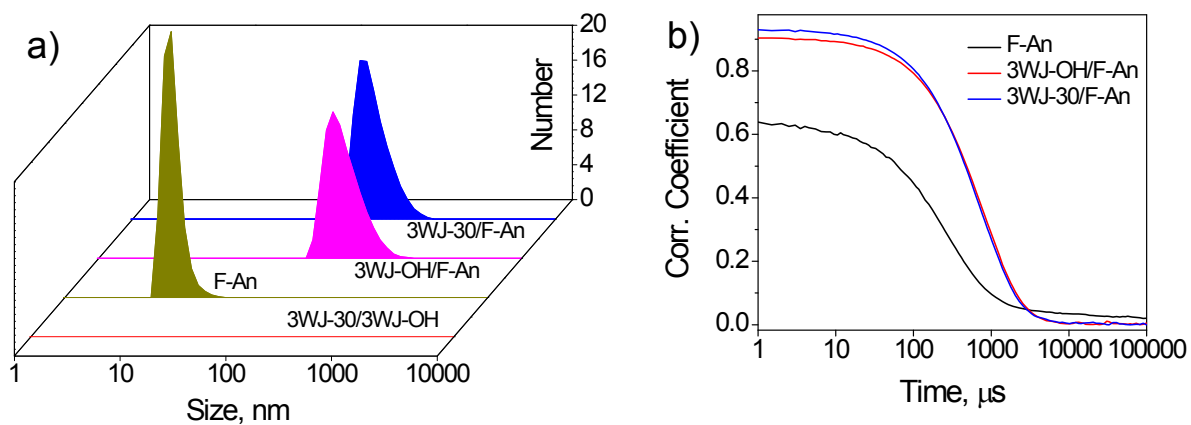

**Figure S10.** a) The number size distribution of **3WJ-30/3WJ-OH**, **F-An**, **3WJ-30/F-An** and **3WJ-OH/F-An** obtained from DLS measurements. b) Corresponding correlogram plots.

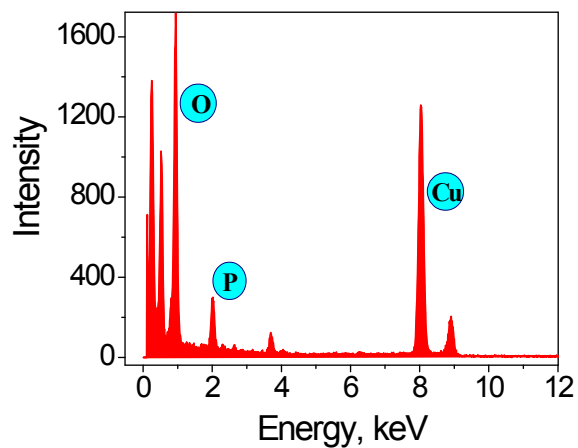

**Figure S11.** EDAX analysis of **3WJ-OH/F-An (1:1)** entangled 2D-nanonetwork showing corresponding peaks arising from the phosphorous atoms of DNA backbone.

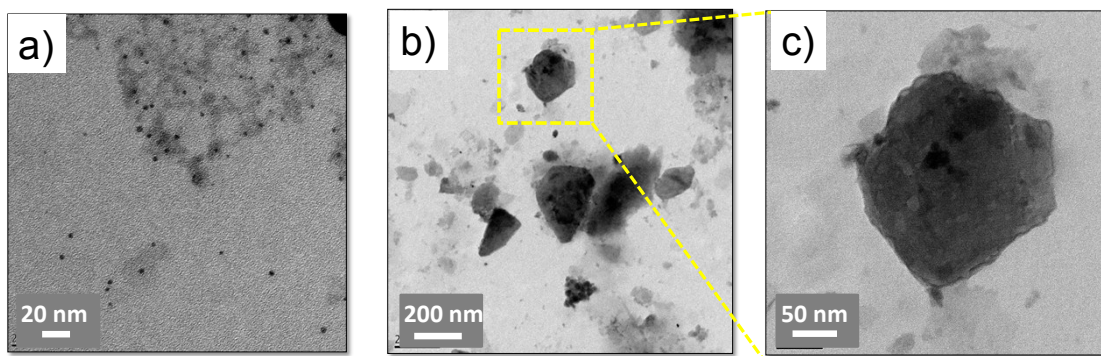

**Figure S12.** TEM image of a) **3WJ-OH/AgNCs** b) **3WJ-OH/F-An** stabilized **AgNCs** and c) Zoomed TEM image of selected portion showing realigned nanosheet structure after the formation of overhang templated **AgNCs**.



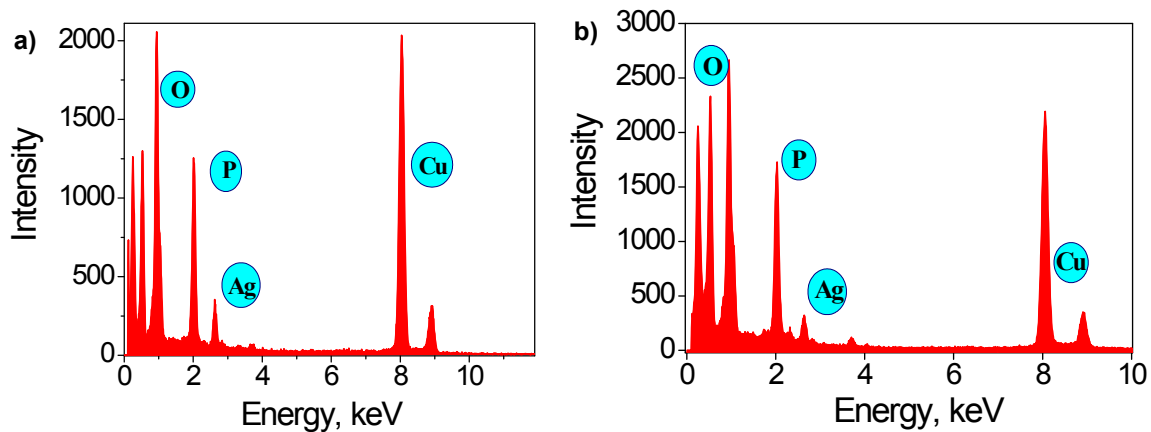

**Figure S13.** EDAX analysis of a) 3WJ-OH/AgNCs and b) 3WJ-OH/F-An nanonetwork embedded AgNCs showing corresponding peaks arising from the phosphorous atoms of DNA backbone and silver atoms from AgNCs.

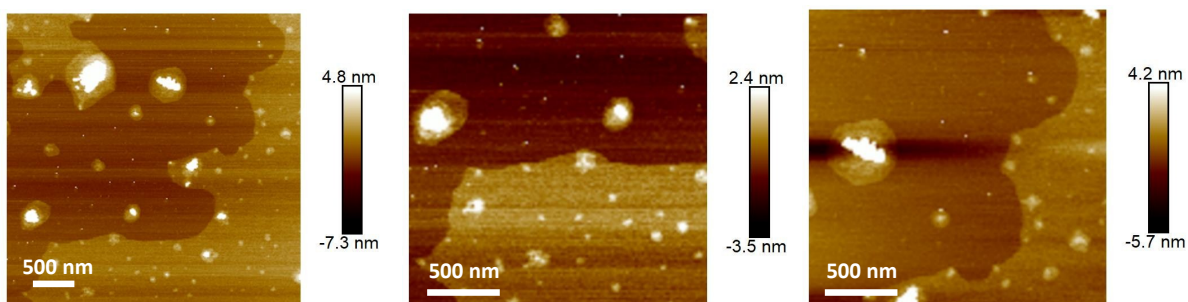

**Figure S14.** Additional AFM images of 3WJ-30/F-An nanosheets.

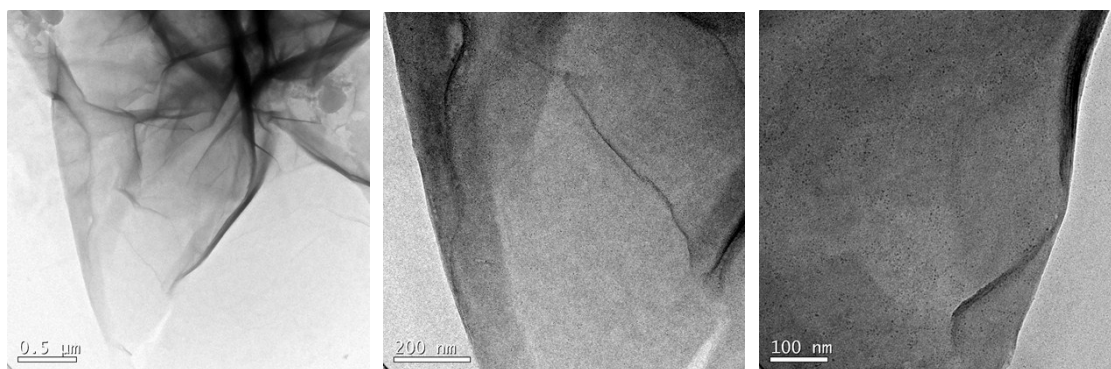

**Figure S15.** Additional TEM images of 3WJ-30/F-An nanosheets with different magnification.
